# Supplementary material for: Synthesis and characterization of heteroatom substituted carbazole derivatives: potential host materials for phosphorescent organic light-emitting diodes
Source: Royal Society of Chemistry journal article supplement (doi:10.1039/c2nj40900c), 2013-01-01
Supplement: c2nj40900c.pdf [file c2nj40900c.pdf]

# Supporting Information

## Synthesis and Characterization of Heteroatom Substituted Carbazole Derivatives: Potential Host Materials for Phosphorescent Organic Light-emitting Diodes

Jian Sun, Hong-ji Jiang <sup>\*[a]</sup>, Jin-long Zhang,

Ye Tao, and Run-feng Chen

### Table of Contents

Figure 1. <sup>1</sup>H NMR shift spectra of E-C in CDCl<sub>3</sub>

Figure 2. <sup>13</sup>C NMR shift spectra of E-C in CDCl<sub>3</sub>

Figure 3. <sup>1</sup>H NMR shift spectra of C-I in CDCl<sub>3</sub>

Figure 4. <sup>13</sup>C NMR shift spectra of C-I in CDCl<sub>3</sub>

Figure 5. <sup>1</sup>H NMR shift spectra of (C-C) in CDCl<sub>3</sub>

Figure 6. <sup>13</sup>C NMR shift spectra of C-C in CDCl<sub>3</sub>

Figure 7. <sup>1</sup>H NMR shift spectra of C-N in CDCl<sub>3</sub>

Figure 8. <sup>13</sup>C NMR shift spectra of C-N in CDCl<sub>3</sub>

Figure 9. <sup>1</sup>H NMR shift spectra of C-O in CDCl<sub>3</sub>

Figure 10.  $^{13}\text{C}$  NMR shift spectra of C-O in  $\text{CDCl}_3$

Figure 11.  $^1\text{H}$  NMR shift spectra of C-S in  $\text{CDCl}_3$

Figure 12.  $^{13}\text{C}$  NMR shift spectra of C-S in  $\text{CDCl}_3$

Figure 13.  $^1\text{H}$  NMR shift spectra of C-SO in  $\text{CDCl}_3$

Figure 14.  $^{13}\text{C}$  NMR shift spectra of C-SO in  $\text{CDCl}_3$

Table S1-S6. The details of quantum chemical calculations

## NMR Spectra

### (1) 9-Ethyl-carbazole (E-C)

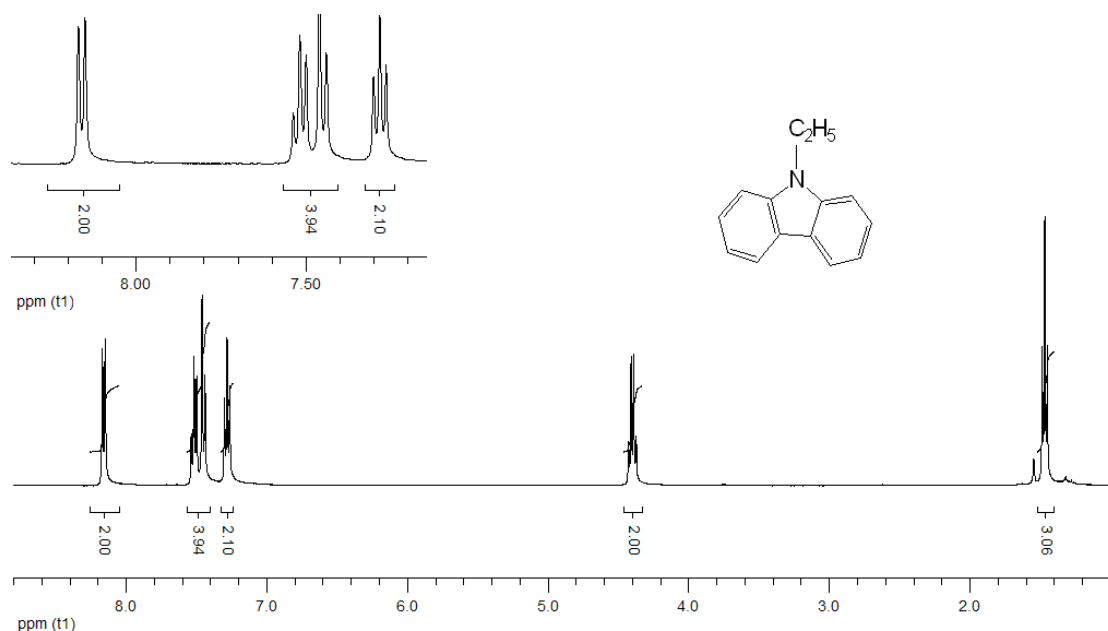

Figure 1.  $^1\text{H}$  NMR shift spectra of E-C in  $\text{CDCl}_3$

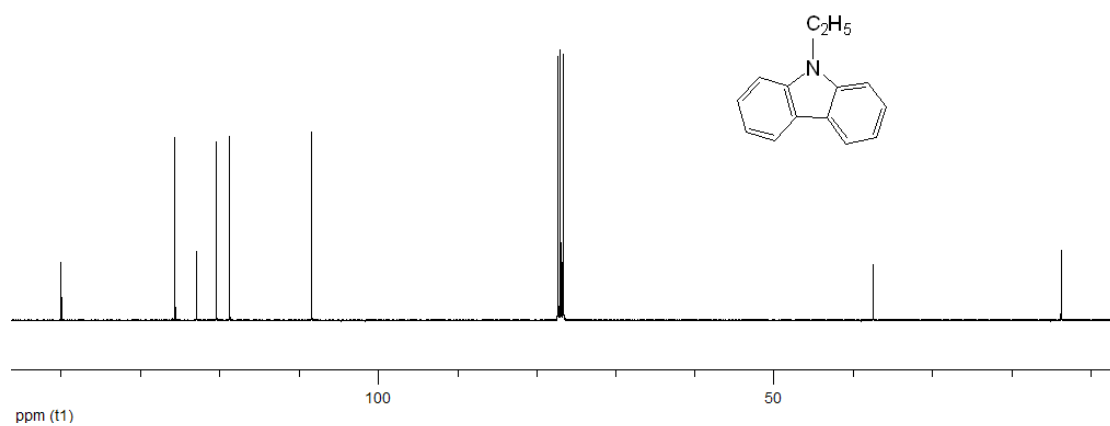

Figure 2.  $^{13}\text{C}$  NMR shift spectra of E-C in  $\text{CDCl}_3$

(2) 3-Iodo-9ethyl-carbazole(C-I)

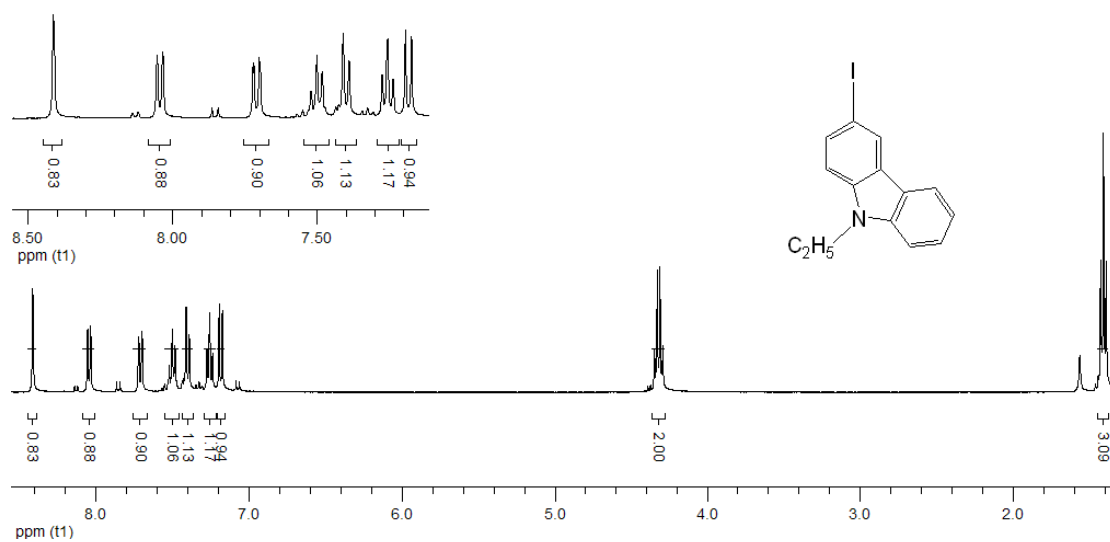

Figure 3.  $^1\text{H}$  NMR shift spectra of C-I in  $\text{CDCl}_3$

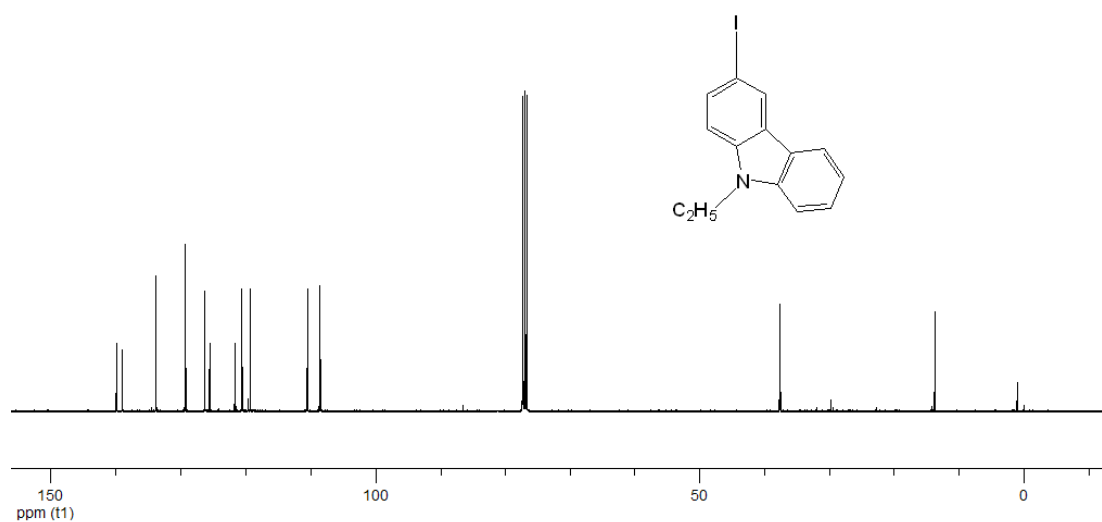

Figure 4.  $^{13}\text{C}$  NMR shift spectra of C-I in  $\text{CDCl}_3$

(3) 9-Ethyl-9H-3,9'-bicarbazole (C-C)

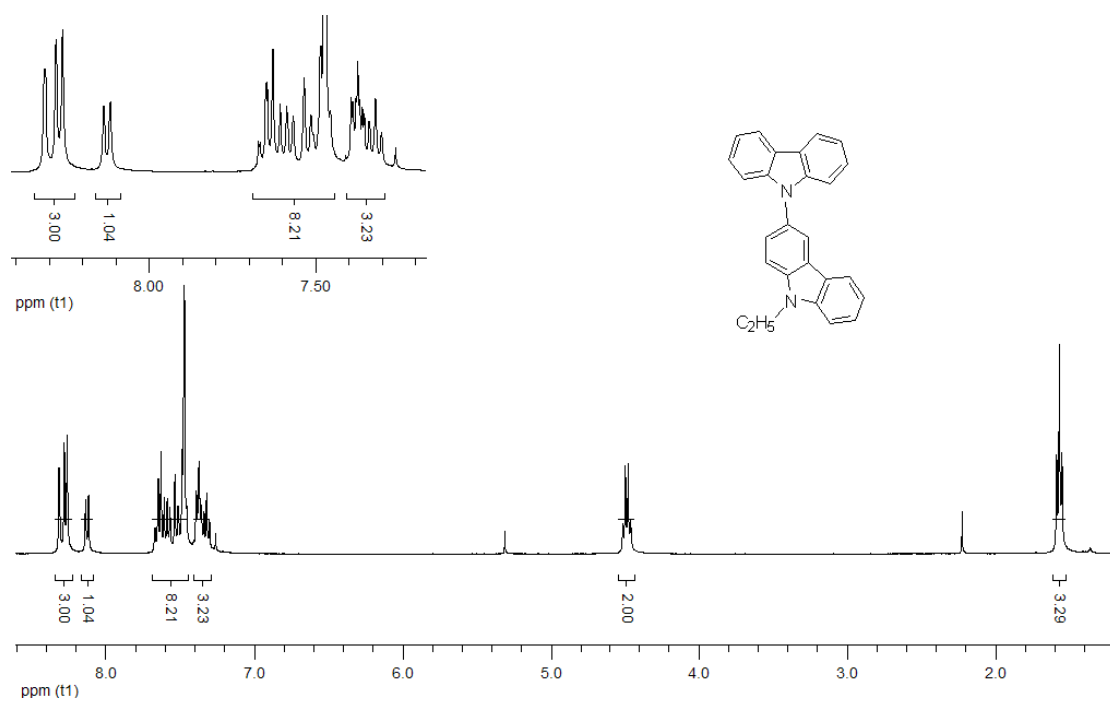

Figure 5.  $^1\text{H}$  NMR shift spectra of (C-C) in  $\text{CDCl}_3$

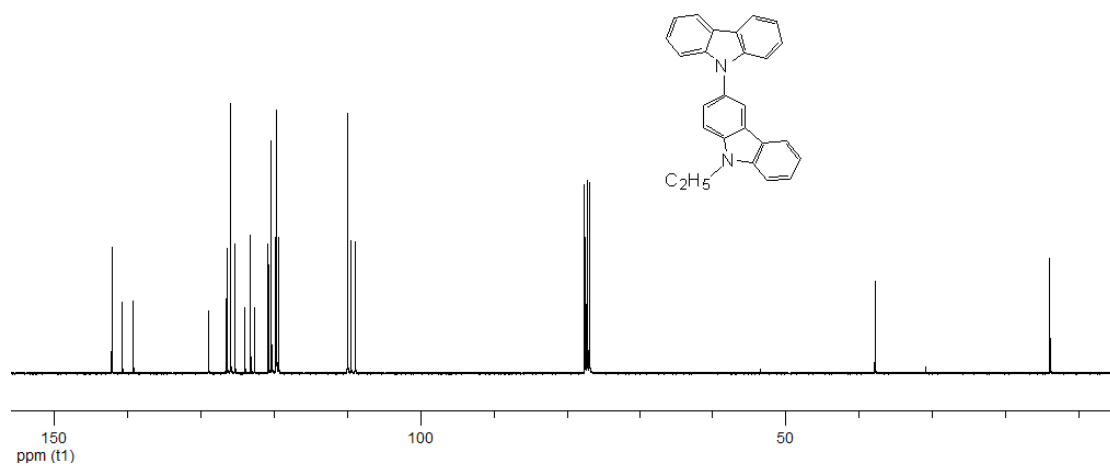

Figure 6. <sup>13</sup>C NMR shift spectra of C-C in CDCl<sub>3</sub>

(4) 9-Ethyl-N,N-diphenyl-9H-carbazol-3-amine (C-N)

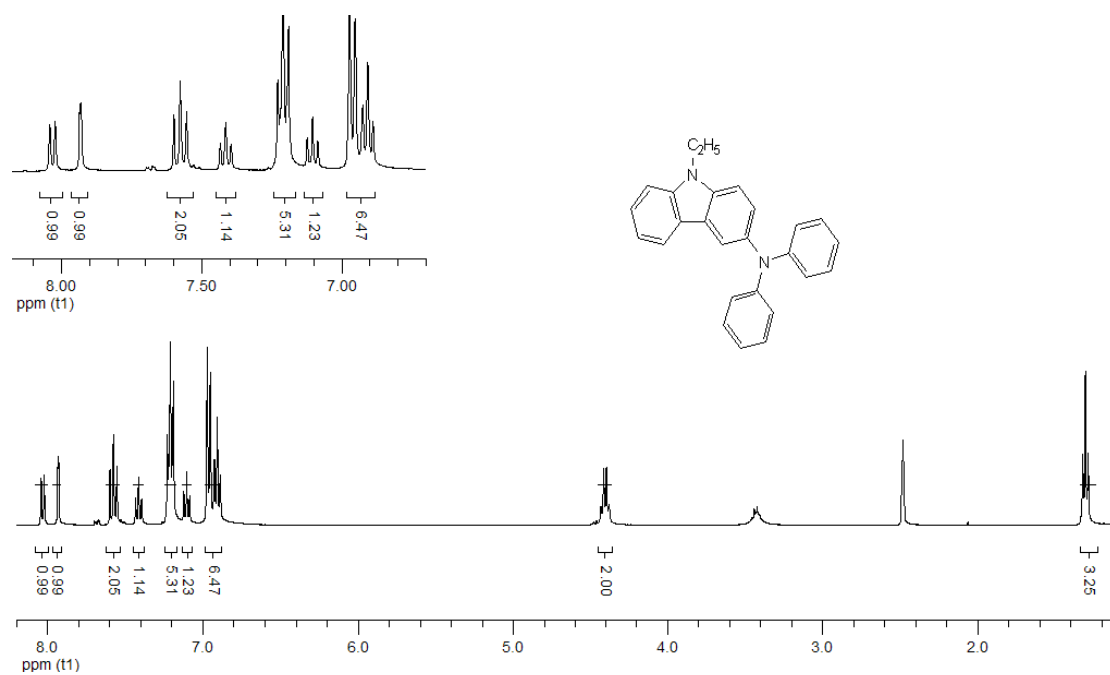

Figure 7. <sup>1</sup>H NMR shift spectra of C-N in CDCl<sub>3</sub>

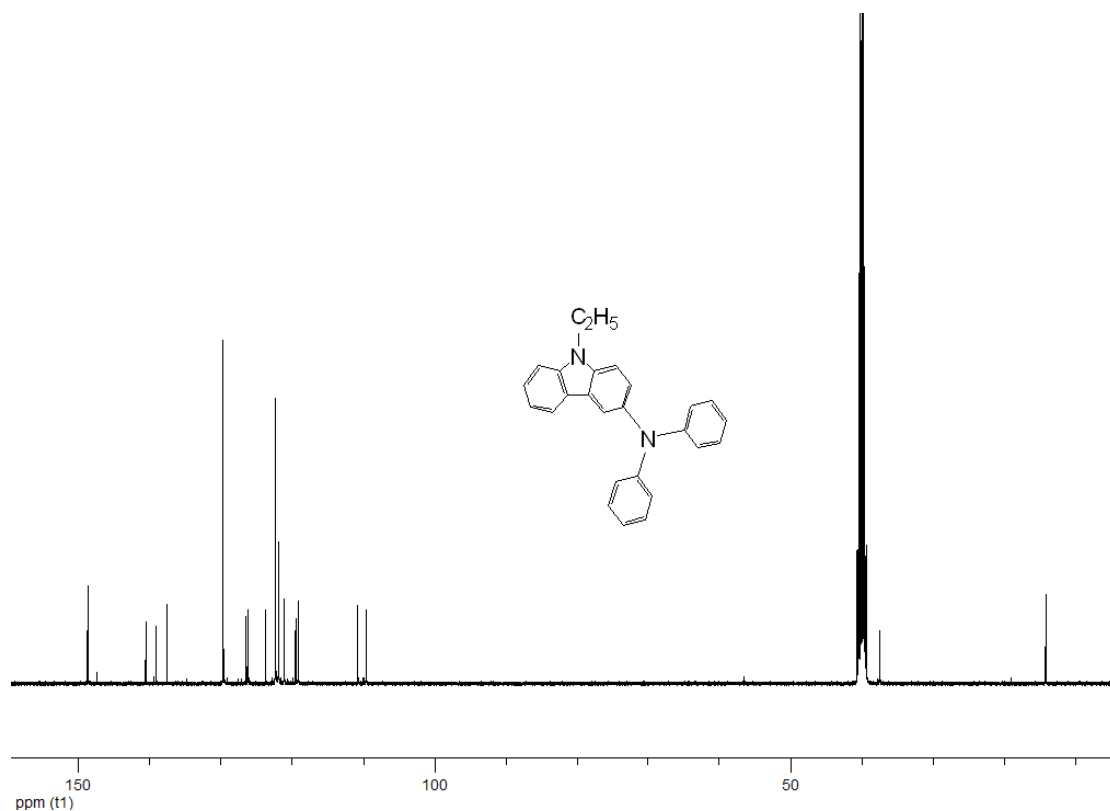

Figure 8.  $^{13}\text{C}$  NMR shift spectra of C-N in  $\text{CDCl}_3$

(5) 10-(9-Ethyl-9H-carbazol-3-yl)-10H-phenoxazine (C-O)

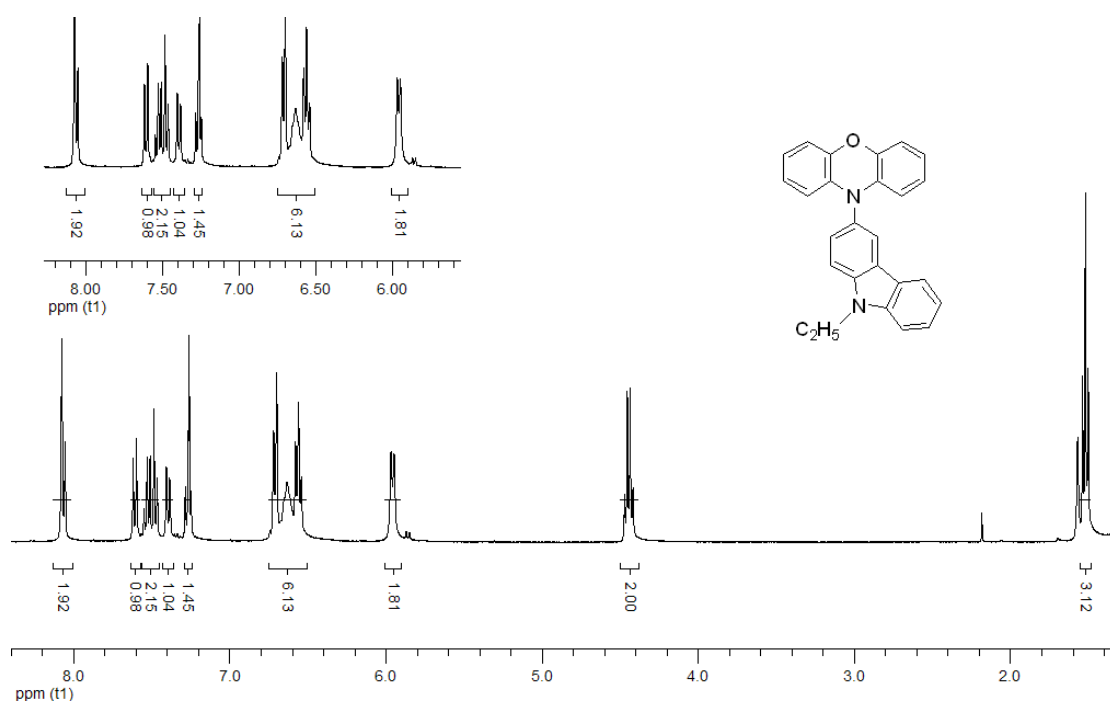

Figure 9.  $^1\text{H}$  NMR shift spectra of C-O in  $\text{CDCl}_3$

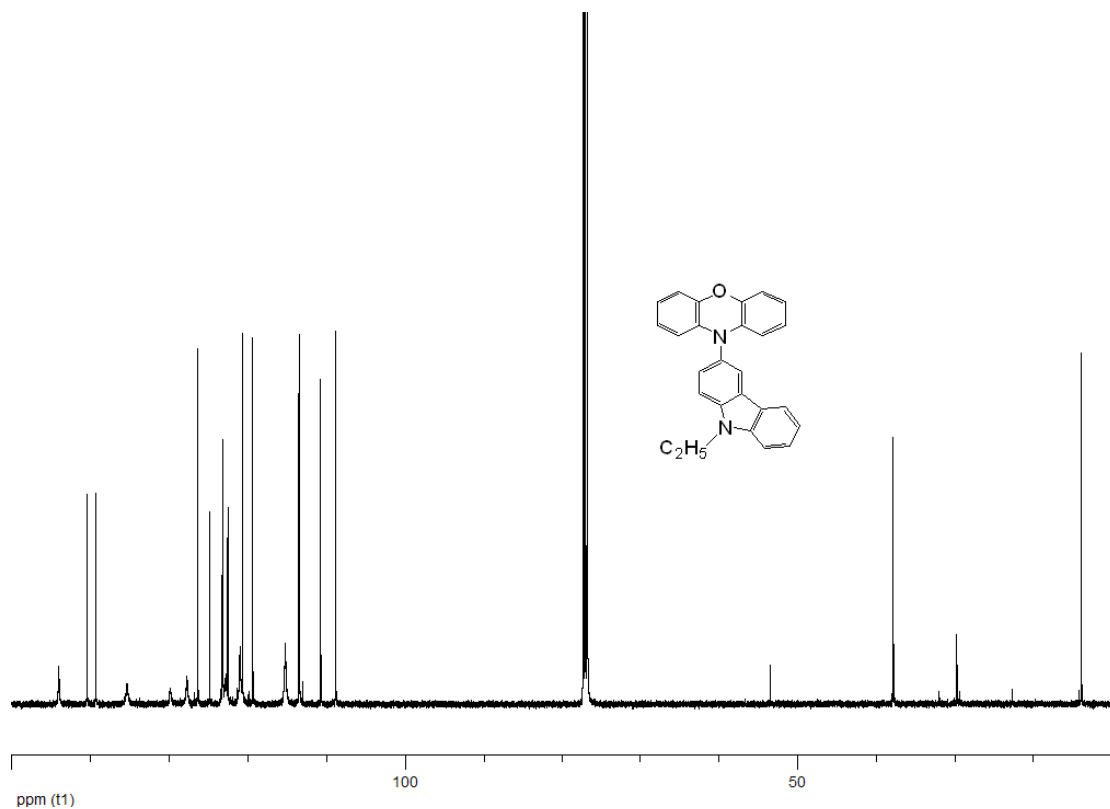

Figure 10.  $^{13}\text{C}$  NMR shift spectra of C-O in  $\text{CDCl}_3$

(6) 10-(9-Ethyl-9H-carbazol-3-yl)-10H-phenothiazine (C-S)

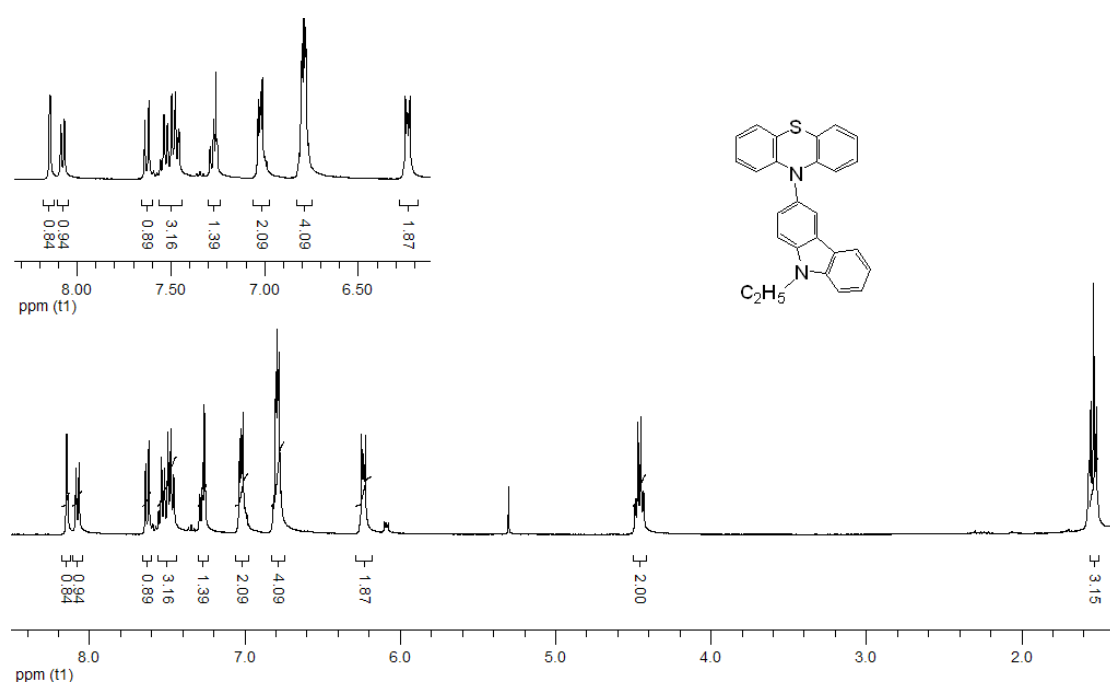

Figure 11.  $^1\text{H}$  NMR shift spectra of C-S in  $\text{CDCl}_3$

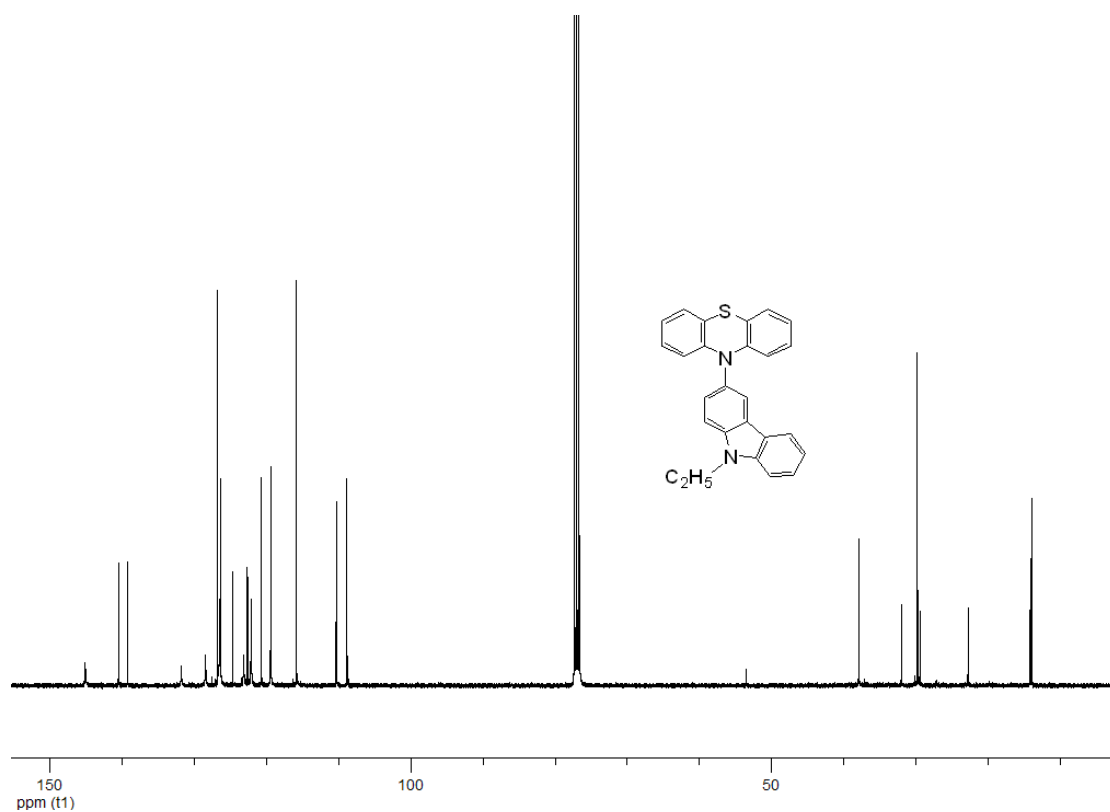

Figure 12.  $^{13}\text{C}$  NMR shift spectra of C-S in  $\text{CDCl}_3$

(7) 10-(9-Ethyl-9H-carbazol-3-yl)-10H-phenothiazine-S,S-dioxide(C-SO)

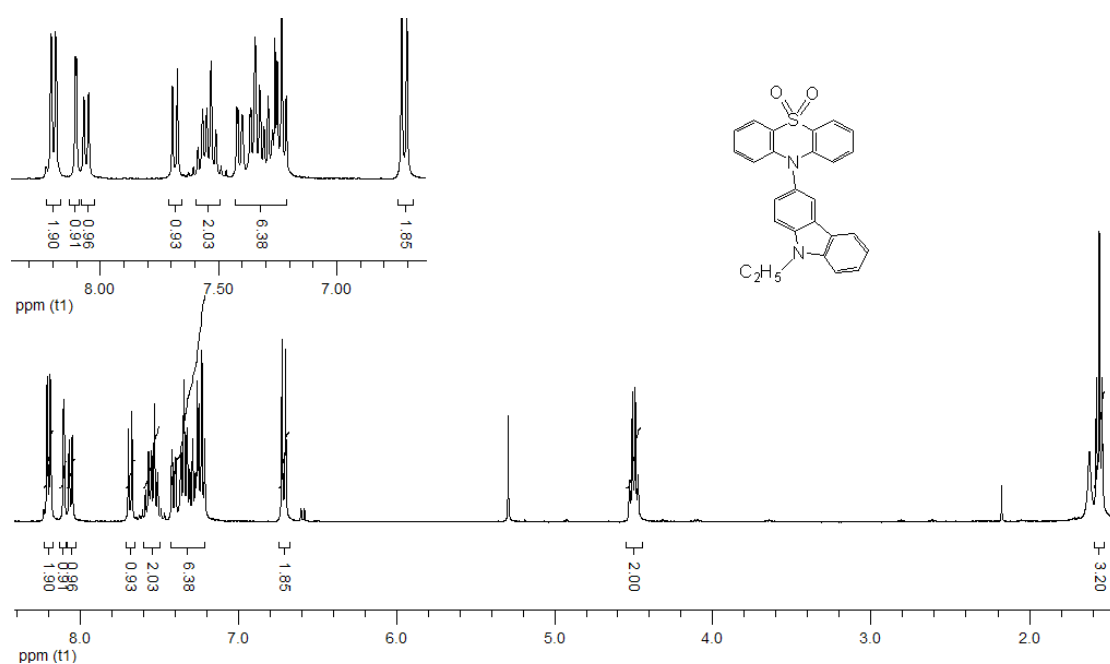



**Figure 13.**  $^1\text{H}$  NMR shift spectra of C-SO in  $\text{CDCl}_3$

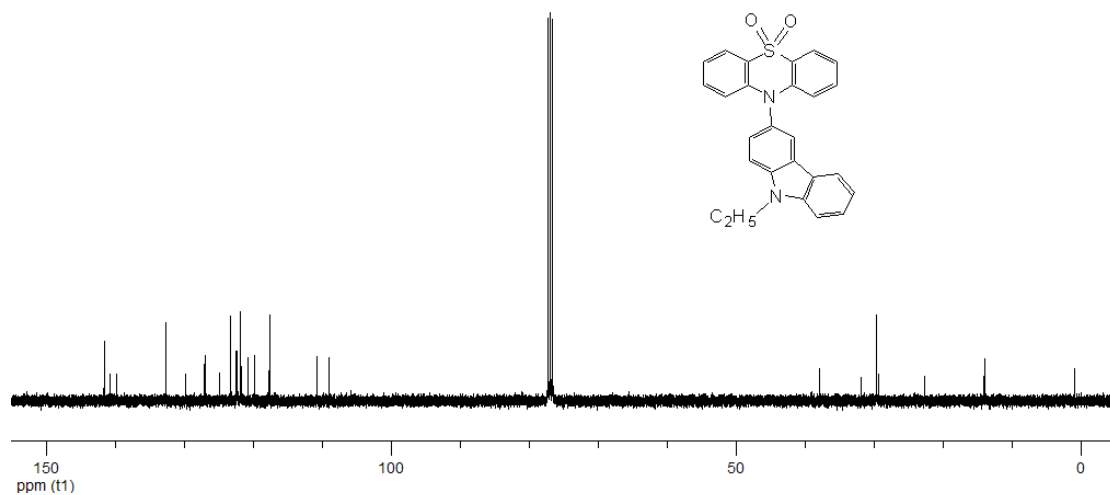

**Figure 14.**  $^{13}\text{C}$  NMR shift spectra of C-SO in  $\text{CDCl}_3$

### The details of quantum chemical calculations

All the optimized geometries with Q-chem 3.2 suite of program are as follows

| Compound E-C                                 |   |                         |           |           |
|----------------------------------------------|---|-------------------------|-----------|-----------|
| DFT/6-31G(d)                                 |   |                         |           |           |
| B3LYP/6-31G(d)                               |   |                         |           |           |
| C1 symmetry                                  |   |                         |           |           |
| Nuclear Repulsion Energy = 921.568656Hartree |   |                         |           |           |
| DFT SCF Energy = -596.082261 Hatree          |   |                         |           |           |
| Atoms                                        |   | Coordinates (Angstroms) |           |           |
|                                              |   | X                       | Y         | Z         |
| 1                                            | C | 3.041708                | -1.702558 | 0.121568  |
| 2                                            | C | 3.426417                | -0.364367 | -0.069687 |
| 3                                            | C | 2.481277                | 0.648877  | -0.218158 |

|    |   |           |           |           |
|----|---|-----------|-----------|-----------|
| 4  | C | 1.129668  | 0.292147  | -0.174695 |
| 5  | C | 0.724188  | -1.055263 | 0.023440  |
| 6  | C | 1.694903  | -2.052610 | 0.169118  |
| 7  | N | -0.000079 | 1.092907  | -0.308509 |
| 8  | C | -1.129617 | 0.291796  | -0.174745 |
| 9  | C | -0.723724 | -1.055473 | 0.023477  |
| 10 | C | -2.481318 | 0.648119  | -0.218213 |
| 11 | C | -3.426151 | -0.365425 | -0.069772 |
| 12 | C | -3.041041 | -1.703500 | 0.121454  |
| 13 | C | -1.694124 | -2.053135 | 0.169081  |
| 14 | C | -0.001217 | 3.303787  | 0.856741  |
| 15 | C | -0.000399 | 2.537462  | -0.470831 |
| 16 | H | 3.803605  | -2.468490 | 0.235046  |
| 17 | H | 4.482791  | -0.110959 | -0.100076 |
| 18 | H | 2.793633  | 1.679540  | -0.358430 |
| 19 | H | 1.400456  | -3.088179 | 0.319468  |
| 20 | H | -2.794016 | 1.678697  | -0.358366 |
| 21 | H | -4.482599 | -0.112325 | -0.100169 |
| 22 | H | -3.802712 | -2.469671 | 0.234833  |
| 23 | H | -1.399350 | -3.088609 | 0.319435  |
| 24 | H | -0.001038 | 4.384299  | 0.672603  |
| 25 | H | -0.887581 | 3.055956  | 1.449769  |
| 26 | H | 0.884333  | 3.055831  | 1.450933  |
| 27 | H | 0.876808  | 2.807403  | -1.068684 |
| 28 | H | -0.877196 | 2.807014  | -1.069473 |

Table S1. E-C

|                                                                                         |       |                                                                                      |          |          |
|-----------------------------------------------------------------------------------------|-------|--------------------------------------------------------------------------------------|----------|----------|
| Compound C-N<br>DFT/6-31G(d)<br>B3LYP/6-31G(d)<br>C1 symmetry                           |       | 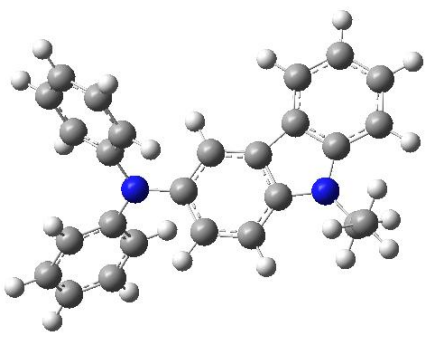 |          |          |
| Nuclear Repulsion Energy = 2368.446603 Hartree<br>DFT SCF Energy = -1113.546145 Hartree |       |                                                                                      |          |          |
|                                                                                         | Atoms | Coordinates (Angstroms)                                                              |          |          |
|                                                                                         |       | X                                                                                    | Y        | Z        |
| 1                                                                                       | C     | -3.326612                                                                            | 3.929436 | 0.959355 |

|    |   |           |           |           |
|----|---|-----------|-----------|-----------|
| 2  | C | -3.915497 | 3.210248  | -0.082846 |
| 3  | C | -3.498808 | 1.913503  | -0.377045 |
| 4  | C | -2.489782 | 1.300592  | 0.385884  |
| 5  | C | -1.903610 | 2.025857  | 1.437405  |
| 6  | C | -2.315664 | 3.328092  | 1.711951  |
| 7  | N | -2.055939 | -0.018550 | 0.094618  |
| 8  | C | -2.974260 | -1.020137 | -0.310904 |
| 9  | C | -4.253519 | -1.101773 | 0.266782  |
| 10 | C | -2.612949 | -1.964158 | -1.287288 |
| 11 | C | -3.507271 | -2.962530 | -1.668706 |
| 12 | C | -4.780736 | -3.033651 | -1.100691 |
| 13 | C | -5.145855 | -2.093535 | -0.134337 |
| 14 | C | -0.666808 | -0.339307 | 0.192453  |
| 15 | C | -0.259676 | -1.465862 | 0.939975  |
| 16 | C | 1.081229  | -1.816177 | 1.058701  |
| 17 | C | 2.033026  | -1.007007 | 0.430184  |
| 18 | C | 1.644405  | 0.140733  | -0.310278 |
| 19 | C | 0.290034  | 0.460282  | -0.439115 |
| 20 | N | 3.417480  | -1.133346 | 0.386125  |
| 21 | C | 3.934208  | -0.072599 | -0.351101 |
| 22 | C | 2.863329  | 0.739911  | -0.812116 |
| 23 | C | 5.264802  | 0.233790  | -0.654479 |
| 24 | C | 5.510524  | 1.361818  | -1.434696 |
| 25 | C | 4.461764  | 2.172999  | -1.901687 |
| 26 | C | 3.138931  | 1.867316  | -1.593925 |
| 27 | C | 4.571401  | -1.741136 | 2.517582  |
| 28 | C | 4.197935  | -2.140893 | 1.085633  |
| 29 | H | -3.649328 | 4.942851  | 1.180352  |
| 30 | H | -4.697124 | 3.665608  | -0.685795 |
| 31 | H | -3.950982 | 1.368792  | -1.199532 |
| 32 | H | -1.124259 | 1.562336  | 2.033461  |
| 33 | H | -1.849012 | 3.870904  | 2.530113  |
| 34 | H | -4.540746 | -0.385374 | 1.029621  |
| 35 | H | -1.629811 | -1.907878 | -1.743203 |
| 36 | H | -3.207457 | -3.681929 | -2.426604 |
| 37 | H | -5.477428 | -3.809558 | -1.404960 |
| 38 | H | -6.129890 | -2.138893 | 0.325554  |
| 39 | H | -1.018338 | -2.068139 | 1.429663  |
| 40 | H | 1.367684  | -2.685941 | 1.642354  |
| 41 | H | -0.026903 | 1.324868  | -1.014471 |
| 42 | H | 6.086145  | -0.379484 | -0.295611 |
| 43 | H | 6.536605  | 1.619238  | -1.683483 |
| 44 | H | 4.687982  | 3.046577  | -2.506300 |
| 45 | H | 2.329732  | 2.497400  | -1.954140 |

|    |   |          |           |          |
|----|---|----------|-----------|----------|
| 46 | H | 5.158234 | -2.534990 | 2.993719 |
| 47 | H | 3.674273 | -1.567761 | 3.120797 |
| 48 | H | 5.166633 | -0.822246 | 2.523156 |
| 49 | H | 5.099109 | -2.335938 | 0.494640 |
| 50 | H | 3.620841 | -3.072055 | 1.085312 |

Table S2. C-N

| Compound C-C<br>DFT/6-31G(d)<br>B3LYP/6-31G(d)<br>C1 symmetry                           |                         | 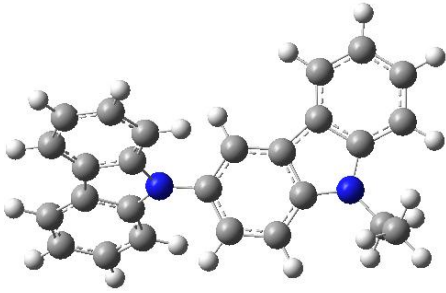 |           |  |
|-----------------------------------------------------------------------------------------|-------------------------|------------------------------------------------------------------------------------|-----------|--|
| Nuclear Repulsion Energy = 2334.272231 Hartree<br>DFT SCF Energy = -1112.371241 Hartree |                         |                                                                                    |           |  |
| Atoms                                                                                   | Coordinates (Angstroms) |                                                                                    |           |  |
|                                                                                         | X                       | Y                                                                                  | Z         |  |
| 1 C                                                                                     | -5.073858               | -2.371709                                                                          | -1.351240 |  |
| 2 C                                                                                     | -3.796638               | -2.956470                                                                          | -1.411938 |  |
| 3 C                                                                                     | -2.668392               | -2.287079                                                                          | -0.943173 |  |
| 4 C                                                                                     | -2.847639               | -1.009975                                                                          | -0.404280 |  |
| 5 C                                                                                     | -4.127653               | -0.400100                                                                          | -0.343056 |  |
| 6 C                                                                                     | -5.244450               | -1.095933                                                                          | -0.821255 |  |
| 7 N                                                                                     | -1.897246               | -0.129206                                                                          | 0.117998  |  |
| 8 C                                                                                     | -2.551062               | 1.040383                                                                           | 0.514564  |  |
| 9 C                                                                                     | -3.938086               | 0.910016                                                                           | 0.243768  |  |
| 10 C                                                                                    | -2.024641               | 2.190723                                                                           | 1.108787  |  |
| 11 C                                                                                    | -2.908363               | 3.222062                                                                           | 1.418684  |  |
| 12 C                                                                                    | -4.284099               | 3.114560                                                                           | 1.148827  |  |
| 13 C                                                                                    | -4.803479               | 1.962663                                                                           | 0.565074  |  |
| 14 C                                                                                    | -0.499457               | -0.382930                                                                          | 0.230832  |  |
| 15 C                                                                                    | -0.049260               | -1.437266                                                                          | 1.050500  |  |
| 16 C                                                                                    | 1.306510                | -1.720813                                                                          | 1.183620  |  |
| 17 C                                                                                    | 2.218704                | -0.916425                                                                          | 0.492751  |  |
| 18 C                                                                                    | 1.779913                | 0.160128                                                                           | -0.325250 |  |
| 19 C                                                                                    | 0.412670                | 0.413987                                                                           | -0.462911 |  |
| 20 N                                                                                    | 3.604945                | -0.987052                                                                          | 0.448298  |  |
| 21 C                                                                                    | 4.074553                | 0.039904                                                                           | -0.366139 |  |

|    |   |           |           |           |
|----|---|-----------|-----------|-----------|
| 22 | C | 2.969940  | 0.772340  | -0.876680 |
| 23 | C | 5.390316  | 0.378228  | -0.698211 |
| 24 | C | 5.585835  | 1.457000  | -1.557967 |
| 25 | C | 4.502630  | 2.188571  | -2.075426 |
| 26 | C | 3.194807  | 1.851589  | -1.738885 |
| 27 | C | 4.808739  | -1.389150 | 2.600466  |
| 28 | C | 4.432037  | -1.910679 | 1.209350  |
| 29 | H | -5.933649 | -2.921111 | -1.724251 |
| 30 | H | -3.683776 | -3.950949 | -1.835559 |
| 31 | H | -1.683485 | -2.739628 | -0.997787 |
| 32 | H | -6.232009 | -0.643256 | -0.781581 |
| 33 | H | -0.964370 | 2.275790  | 1.324011  |
| 34 | H | -2.523440 | 4.127355  | 1.880684  |
| 35 | H | -4.946217 | 3.938055  | 1.401182  |
| 36 | H | -5.868446 | 1.879304  | 0.363396  |
| 37 | H | -0.782103 | -2.028297 | 1.590773  |
| 38 | H | 1.632997  | -2.536570 | 1.821260  |
| 39 | H | 0.050855  | 1.215172  | -1.100396 |
| 40 | H | 6.237548  | -0.173413 | -0.301844 |
| 41 | H | 6.599306  | 1.738456  | -1.830845 |
| 42 | H | 4.690510  | 3.024860  | -2.742489 |
| 43 | H | 2.358947  | 2.419630  | -2.138985 |
| 44 | H | 5.432113  | -2.122068 | 3.125114  |
| 45 | H | 3.914020  | -1.204050 | 3.203704  |
| 46 | H | 5.368308  | -0.451035 | 2.527034  |
| 47 | H | 5.331512  | -2.117038 | 0.619752  |
| 48 | H | 3.890018  | -2.859142 | 1.287889  |

Table S3. C-C

|                                                                                         |                                                                                      |
|-----------------------------------------------------------------------------------------|--------------------------------------------------------------------------------------|
| Compound C-S<br>DFT/6-31G(d)<br>B3LYP/6-31G(d)<br>C1 symmetry                           | 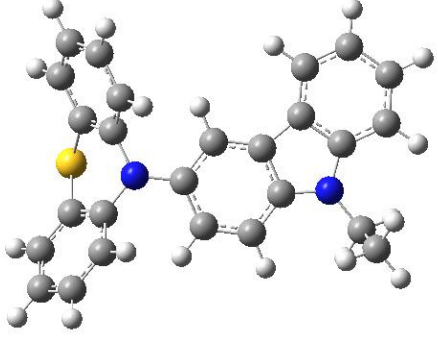 |
| Nuclear Repulsion Energy = 2683.383051 Hartree<br>DFT SCF Energy = -1510.527149 Hartree |                                                                                      |

| Atoms |   | Coordinates (Angstroms) |           |           |
|-------|---|-------------------------|-----------|-----------|
|       |   | X                       | Y         | Z         |
| 1     | C | -3.074198               | 1.665678  | -0.500412 |
| 2     | C | -2.164517               | 1.238177  | 0.481000  |
| 3     | N | -1.711001               | -0.113955 | 0.475011  |
| 4     | C | -2.741710               | -1.091291 | 0.349351  |
| 5     | C | -3.721531               | -0.937575 | -0.645652 |
| 6     | S | -3.634838               | 0.486917  | -1.720561 |
| 7     | C | -3.543786               | 2.982330  | -0.506673 |
| 8     | C | -3.097029               | 3.884655  | 0.457638  |
| 9     | C | -2.217525               | 3.458825  | 1.456025  |
| 10    | C | -1.771899               | 2.138056  | 1.480330  |
| 11    | C | -2.838459               | -2.172430 | 1.235309  |
| 12    | C | -3.847896               | -3.121895 | 1.083678  |
| 13    | C | -4.800734               | -2.977921 | 0.072103  |
| 14    | C | -4.751144               | -1.873914 | -0.777739 |
| 15    | C | -0.336033               | -0.438389 | 0.258924  |
| 16    | C | 0.057962                | -1.782224 | 0.051162  |
| 17    | C | 1.386524                | -2.139167 | -0.161163 |
| 18    | C | 2.355803                | -1.136906 | -0.177637 |
| 19    | C | 1.983741                | 0.215726  | 0.010624  |
| 20    | C | 0.645563                | 0.561372  | 0.221675  |
| 21    | N | 3.733184                | -1.215292 | -0.381006 |
| 22    | C | 4.259152                | 0.068086  | -0.304204 |
| 23    | C | 3.203314                | 0.992837  | -0.073260 |
| 24    | C | 5.586272                | 0.493822  | -0.426170 |
| 25    | C | 5.844232                | 1.859271  | -0.324442 |
| 26    | C | 4.810910                | 2.786214  | -0.102273 |
| 27    | C | 3.491988                | 2.358646  | 0.024166  |
| 28    | C | 4.956183                | -3.049704 | 0.793937  |
| 29    | C | 4.497121                | -2.440839 | -0.536184 |
| 30    | H | -4.259160               | 3.291792  | -1.263192 |
| 31    | H | -3.454324               | 4.910401  | 0.443101  |
| 32    | H | -1.890551               | 4.150378  | 2.227378  |
| 33    | H | -1.106064               | 1.792967  | 2.265176  |
| 34    | H | -2.106584               | -2.264886 | 2.031839  |
| 35    | H | -3.899691               | -3.964800 | 1.767067  |
| 36    | H | -5.595319               | -3.710050 | -0.040474 |
| 37    | H | -5.509735               | -1.730933 | -1.541952 |
| 38    | H | -0.688838               | -2.565206 | 0.037289  |
| 39    | H | 1.639886                | -3.183884 | -0.316479 |
| 40    | H | 0.379015                | 1.604211  | 0.338440  |
| 41    | H | 6.396280                | -0.210473 | -0.592269 |

|    |   |          |           |           |
|----|---|----------|-----------|-----------|
| 42 | H | 6.867981 | 2.212278  | -0.416914 |
| 43 | H | 5.046169 | 3.844125  | -0.027803 |
| 44 | H | 2.694661 | 3.077206  | 0.196989  |
| 45 | H | 5.523450 | -3.970821 | 0.616857  |
| 46 | H | 4.097093 | -3.290811 | 1.428422  |
| 47 | H | 5.596611 | -2.350603 | 1.341543  |
| 48 | H | 5.359751 | -2.220744 | -1.174460 |
| 49 | H | 3.877682 | 3.154723  | 1.090282  |

Table S4. C-S

| Compound C-SO<br>DFT/6-31G(d)<br>B3LYP/6-31G(d)<br>C1 symmetry                          |   | 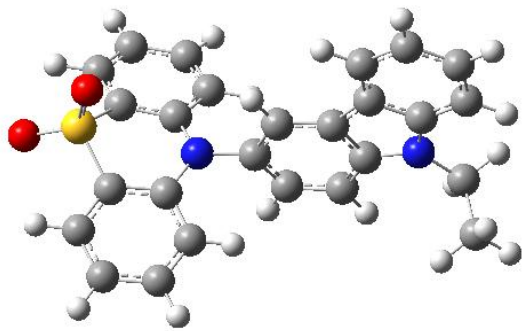 |           |           |
|-----------------------------------------------------------------------------------------|---|-------------------------------------------------------------------------------------|-----------|-----------|
| Nuclear Repulsion Energy = 3081.156329 Hartree<br>DFT SCF Energy = -1660.916761 Hartree |   |                                                                                     |           |           |
| Atoms                                                                                   |   | Coordinates (Angstroms)                                                             |           |           |
|                                                                                         |   | X                                                                                   | Y         | Z         |
| 1                                                                                       | C | 3.402057                                                                            | -1.295701 | -0.162321 |
| 2                                                                                       | C | 2.064500                                                                            | -1.150335 | -0.583598 |
| 3                                                                                       | N | 1.346993                                                                            | 0.045347  | -0.383691 |
| 4                                                                                       | C | 1.981463                                                                            | 1.283085  | -0.160629 |
| 5                                                                                       | C | 3.311173                                                                            | 1.366477  | 0.300640  |
| 6                                                                                       | S | 4.100204                                                                            | -0.088866 | 0.929663  |
| 7                                                                                       | C | 4.150310                                                                            | -2.439121 | -0.452797 |
| 8                                                                                       | C | 3.565006                                                                            | -3.495390 | -1.138376 |
| 9                                                                                       | C | 2.222156                                                                            | -3.392000 | -1.517049 |
| 10                                                                                      | C | 1.482052                                                                            | -2.245034 | -1.254341 |
| 11                                                                                      | C | 1.320331                                                                            | 2.498774  | -0.430120 |
| 12                                                                                      | C | 1.979837                                                                            | 3.713465  | -0.282278 |
| 13                                                                                      | C | 3.316950                                                                            | 3.772115  | 0.125071  |
| 14                                                                                      | C | 3.978638                                                                            | 2.587802  | 0.421467  |
| 15                                                                                      | C | -0.083136                                                                           | 0.031126  | -0.580061 |
| 16                                                                                      | C | -0.626560                                                                           | 0.235132  | -1.863025 |

|    |   |           |           |           |
|----|---|-----------|-----------|-----------|
| 17 | C | -2.003230 | 0.228389  | -2.070964 |
| 18 | C | -2.833591 | 0.008325  | -0.966010 |
| 19 | C | -2.295107 | -0.194103 | 0.335535  |
| 20 | C | -0.910245 | -0.183092 | 0.520821  |
| 21 | N | -4.216703 | -0.061476 | -0.901435 |
| 22 | C | -4.588347 | -0.281758 | 0.423527  |
| 23 | C | -3.420997 | -0.379737 | 1.225285  |
| 24 | C | -5.866620 | -0.408447 | 0.976009  |
| 25 | C | -5.959310 | -0.643080 | 2.346119  |
| 26 | C | -4.812375 | -0.746812 | 3.152738  |
| 27 | C | -3.542211 | -0.616334 | 2.599642  |
| 28 | O | 5.556208  | -0.003228 | 0.722874  |
| 29 | O | 3.590832  | -0.343039 | 2.290106  |
| 30 | C | -5.542872 | 1.616809  | -2.193641 |
| 31 | C | -5.132555 | 0.151423  | -2.012471 |
| 32 | H | 5.182814  | -2.479586 | -0.120164 |
| 33 | H | 4.137388  | -4.389613 | -1.363963 |
| 34 | H | 1.742417  | -4.213852 | -2.041755 |
| 35 | H | 0.451368  | -2.186682 | -1.580335 |
| 36 | H | 0.292173  | 2.486027  | -0.769010 |
| 37 | H | 1.440793  | 4.630358  | -0.505153 |
| 38 | H | 3.826104  | 4.725912  | 0.220772  |
| 39 | H | 5.009787  | 2.582107  | 0.760676  |
| 40 | H | 0.047334  | 0.402493  | -2.698022 |
| 41 | H | -2.407217 | 0.393320  | -3.064997 |
| 42 | H | -0.467800 | -0.335525 | 1.500945  |
| 43 | H | -6.761813 | -0.325095 | 0.367127  |
| 44 | H | -6.941458 | -0.745400 | 2.799489  |
| 45 | H | -4.921295 | -0.929127 | 4.217765  |
| 46 | H | -2.657034 | -0.695436 | 3.225110  |
| 47 | H | -6.230089 | 1.716368  | -3.041342 |
| 48 | H | -6.044968 | 1.995446  | -1.297558 |
| 49 | H | -4.668224 | 2.247195  | -2.384334 |
| 50 | H | -4.652339 | -0.229321 | -2.920014 |

Table S5. C-SO



| Compound C-O<br>DFT/6-31G(d)<br>B3LYP/6-31G(d)<br>C1 symmetry                           |                         | 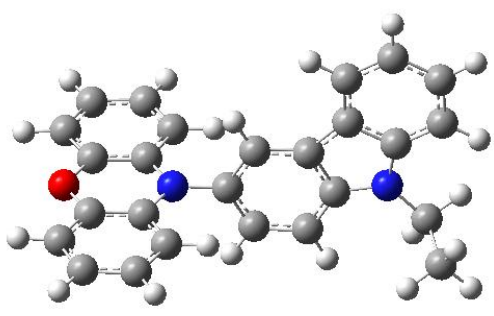 |          |          |
|-----------------------------------------------------------------------------------------|-------------------------|------------------------------------------------------------------------------------|----------|----------|
| Nuclear Repulsion Energy = 2518.889575 Hartree<br>DFT SCF Energy = -1187.563576 Hartree |                         |                                                                                    |          |          |
| Atom                                                                                    | Coordinates (Angstroms) |                                                                                    |          |          |
| s                                                                                       | X                       | Y                                                                                  | Z        |          |
| 1                                                                                       | C                       | 3.987700                                                                           | -1.14296 | 0.048414 |
|                                                                                         |                         | 1                                                                                  |          |          |
| 2                                                                                       | C                       | 2.601531                                                                           | -1.18063 | -0.19682 |
|                                                                                         |                         | 6                                                                                  | 2        |          |
| 3                                                                                       | N                       | 1.860558                                                                           | 0.016847 | -0.14547 |
|                                                                                         |                         |                                                                                    | 3        |          |
| 4                                                                                       | C                       | 2.527371                                                                           | 1.225843 | 0.135210 |
| 5                                                                                       | C                       | 3.915169                                                                           | 1.206902 | 0.373416 |
| 6                                                                                       | O                       | 4.647169                                                                           | 0.035548 | 0.340747 |
| 7                                                                                       | C                       | 4.756204                                                                           | -2.29711 | 0.009049 |
|                                                                                         |                         | 1                                                                                  |          |          |
| 8                                                                                       | C                       | 4.161142                                                                           | -3.53018 | -0.27690 |
|                                                                                         |                         | 1                                                                                  | 4        |          |
| 9                                                                                       | C                       | 2.792785                                                                           | -3.58494 | -0.52088 |
|                                                                                         |                         | 5                                                                                  | 8        |          |
| 1                                                                                       | C                       | 2.018883                                                                           | -2.42060 | -0.48167 |
| 0                                                                                       |                         | 1                                                                                  | 1        |          |
| 1                                                                                       | C                       | 1.868683                                                                           | 2.459144 | 0.191057 |
| 1                                                                                       |                         |                                                                                    |          |          |
| 1                                                                                       | C                       | 2.570363                                                                           | 3.635221 | 0.475282 |
| 2                                                                                       |                         |                                                                                    |          |          |
| 1                                                                                       | C                       | 3.941249                                                                           | 3.599060 | 0.708158 |
| 3                                                                                       |                         |                                                                                    |          |          |
| 1                                                                                       | C                       | 4.611967                                                                           | 2.372788 | 0.655134 |
| 4                                                                                       |                         |                                                                                    |          |          |
| 1                                                                                       | C                       | 0.453369                                                                           | 0.009692 | -0.41740 |
| 5                                                                                       |                         |                                                                                    | 9        |          |
| 1                                                                                       | C                       | 0.000199                                                                           | 0.177070 | -1.74088 |

|   |   |          |          |          |
|---|---|----------|----------|----------|
| 6 |   |          |          | 4        |
| 1 | C | -1.35733 | 0.173542 | -2.04788 |
| 7 |   | 2        |          | 7        |
| 1 | C | -2.26670 | -0.00691 | -0.99975 |
| 8 |   | 2        | 8        | 9        |
| 1 | C | -1.82543 | -0.17202 | 0.342106 |
| 9 |   | 6        | 6        |          |
| 2 | C | -0.45674 | -0.16378 | 0.625626 |
| 0 |   | 1        | 3        |          |
| 2 | N | -3.65295 | -0.06715 | -1.03333 |
| 1 |   | 9        | 7        | 9        |
| 2 | C | -4.12085 | -0.24471 | 0.266495 |
| 2 |   | 5        | 6        |          |
| 2 | C | -3.01452 | -0.32435 | 1.153169 |
| 3 |   | 6        | 8        |          |
| 2 | C | -5.43625 | -0.34884 | 0.729575 |
| 4 |   | 8        | 3        |          |
| 2 | C | -5.62962 | -0.54281 | 2.095687 |
| 5 |   | 3        | 9        |          |
| 2 | C | -4.54463 | -0.62821 | 2.985433 |
| 6 |   | 0        | 4        |          |
| 2 | C | -3.23704 | -0.51971 | 2.520979 |
| 7 |   | 9        | 1        |          |
| 2 | C | -4.86483 | 1.581040 | -2.46877 |
| 8 |   | 6        |          | 8        |
| 2 | C | -4.48252 | 0.118928 | -2.21419 |
| 9 |   | 5        |          | 8        |
| 3 | H | 5.820251 | -2.20957 | 0.205945 |
| 0 |   |          | 5        |          |
| 3 | H | 4.768337 | -4.42987 | -0.30557 |
| 1 |   |          | 4        | 7        |
| 3 | H | 2.310904 | -4.53258 | -0.74407 |
| 2 |   |          | 1        | 6        |
| 3 | H | 0.953147 | -2.47175 | -0.67231 |
| 3 |   |          | 1        | 5        |
| 3 | H | 0.800229 | 2.495324 | 0.012076 |
| 4 |   |          |          |          |
| 3 | H | 2.030316 | 4.577053 | 0.512203 |
| 5 |   |          |          |          |
| 3 | H | 4.492676 | 4.507825 | 0.929543 |
| 6 |   |          |          |          |
| 3 | H | 5.680879 | 2.299641 | 0.830394 |
| 7 |   |          |          |          |
| 3 | H | 0.735121 | 0.312392 | -2.52860 |

|   |   |          |          |          |
|---|---|----------|----------|----------|
| 8 |   |          |          | 0        |
| 3 | H | -1.68785 | 0.309869 | -3.07299 |
| 9 |   | 3        |          | 5        |
| 4 | H | -0.09027 | -0.28949 | 1.640356 |
| 0 |   | 5        | 1        |          |
| 4 | H | -6.28469 | -0.27909 | 0.055491 |
| 1 |   | 0        | 5        |          |
| 4 | H | -6.64275 | -0.62692 | 2.479421 |
| 2 |   | 8        | 8        |          |
| 4 | H | -4.73088 | -0.77870 | 4.044809 |
| 3 |   | 8        | 1        |          |
| 4 | H | -2.39975 | -0.58466 | 3.210924 |
| 4 |   | 9        | 3        |          |
| 4 | H | -5.48891 | 1.659447 | -3.36619 |
| 5 |   | 3        |          | 9        |
| 4 | H | -5.42585 | 1.991019 | -1.62277 |
| 6 |   | 8        |          | 2        |
| 4 | H | -3.97265 | 2.198475 | -2.61557 |
| 7 |   | 2        |          | 1        |
| 4 | H | -3.93979 | -0.29155 | -3.07218 |
| 8 |   | 3        | 9        | 9        |
| 4 | H | -5.37958 | -0.49747 | -2.09269 |
| 9 |   | 9        | 0        | 5        |

Table S6. C-O
